# Supplementary material for: Insights into the rare earth element potential of coal combustion by-products from western Canada
Source: Royal Society of Chemistry journal article supplement (doi:10.1039/d2va00310d), 2023-01-01

SI Fig 1A: Acid Leach Results for Trace Metals in Fly Ash

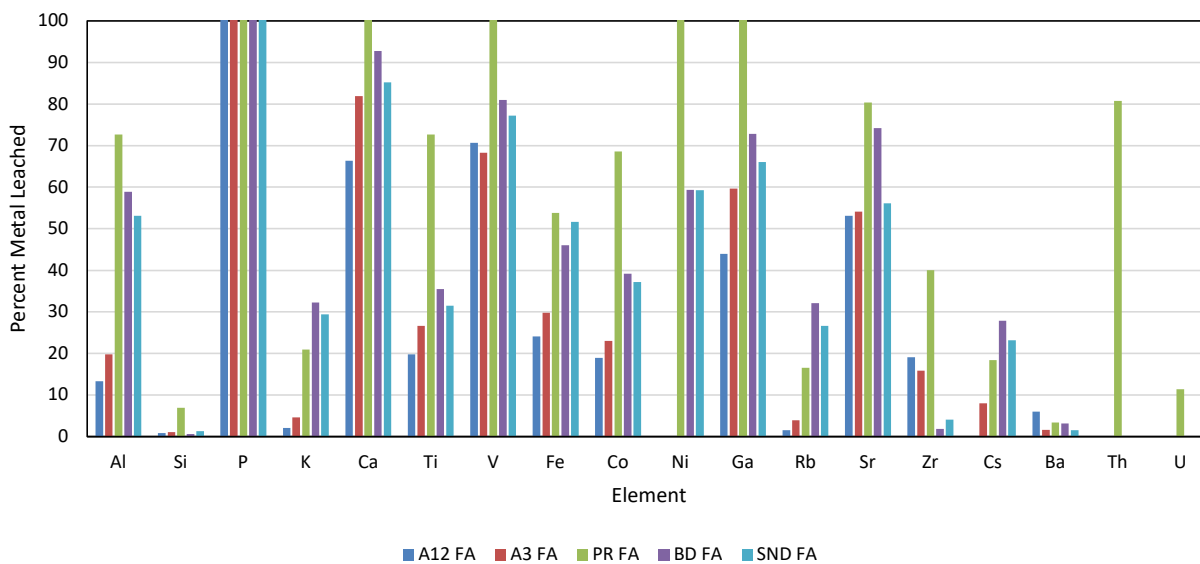

SI Fig 1B: Acid Leach Results for Trace Metals in Bottom Ash

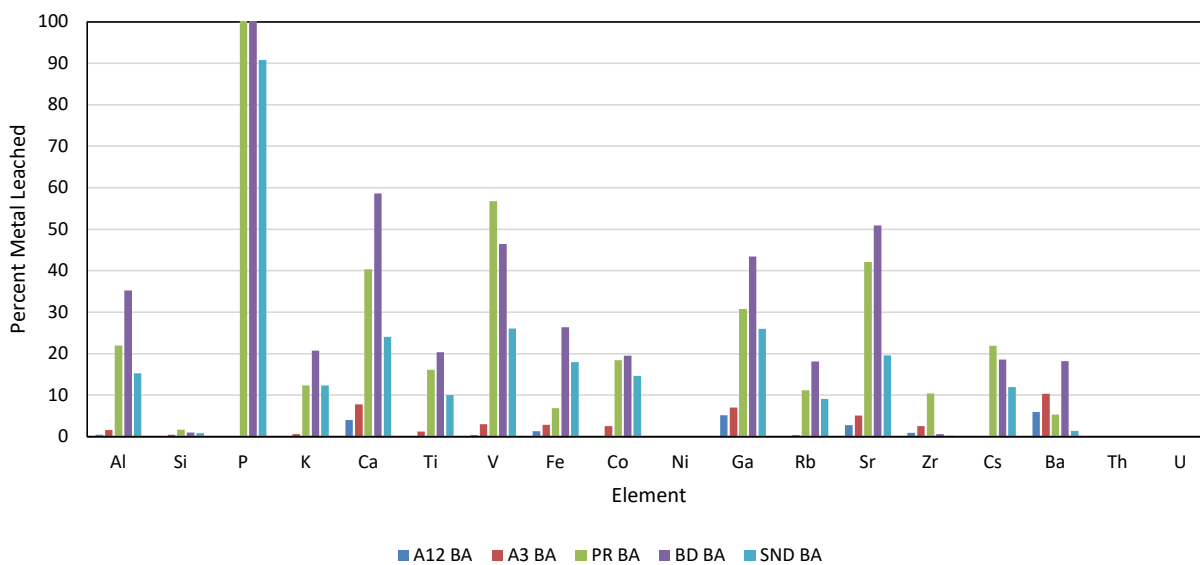

Supplement: d2va00310d1.pdf [file d2va00310d1.pdf]
