# Supplementary figures and images for: Insights into the rare earth element potential of coal combustion by-products from western Canada
Source: Royal Society of Chemistry journal article supplement (doi:10.1039/d2va00310d), 2023-01-01

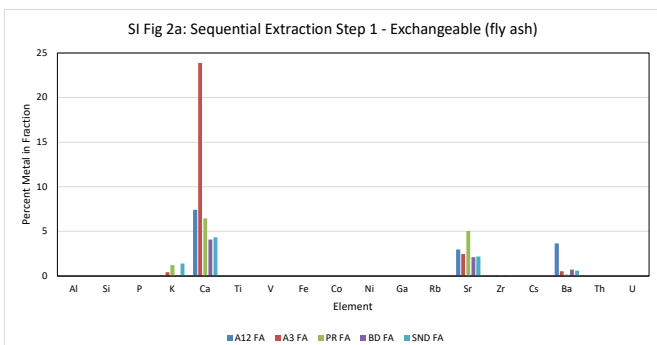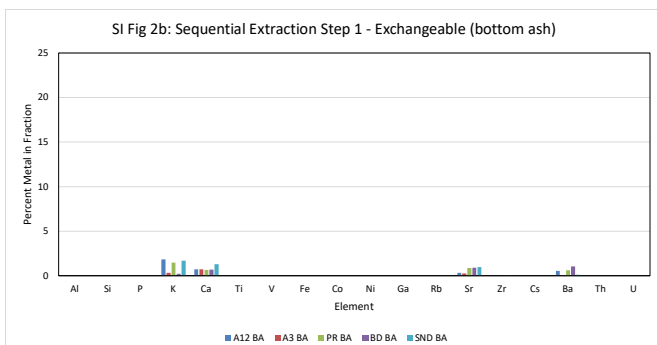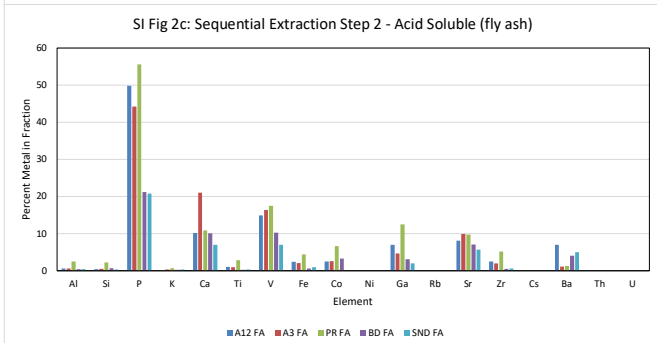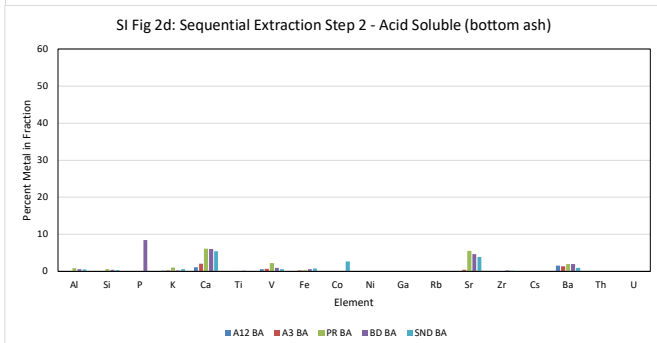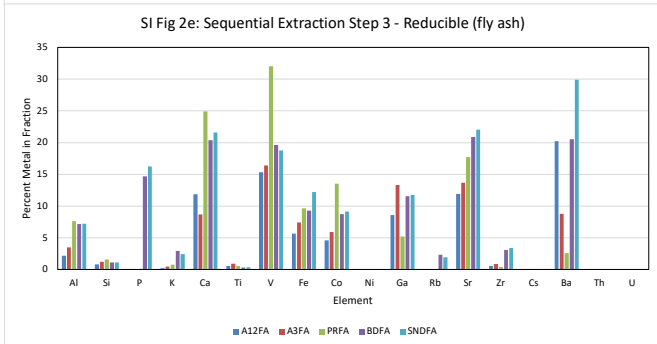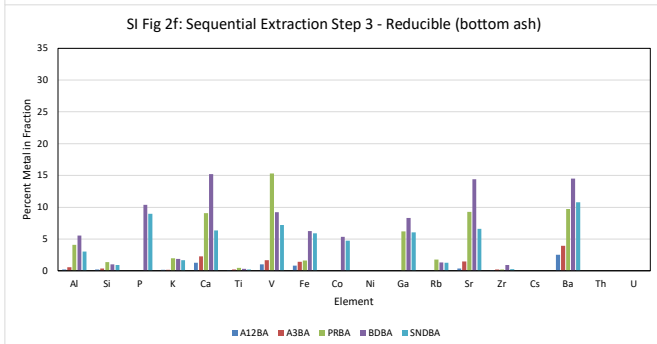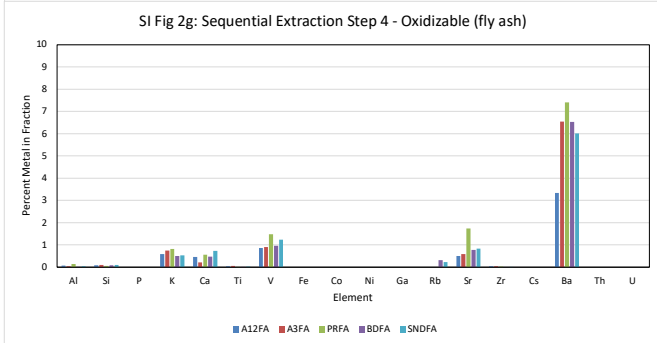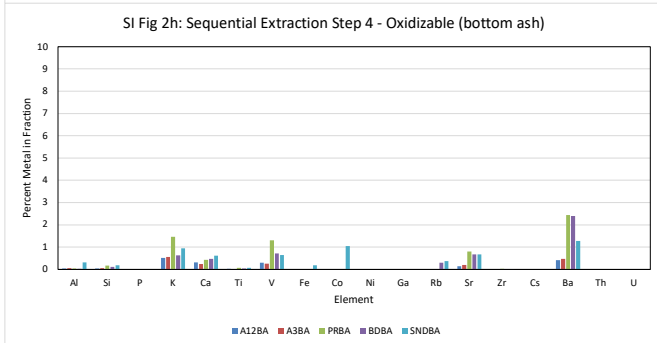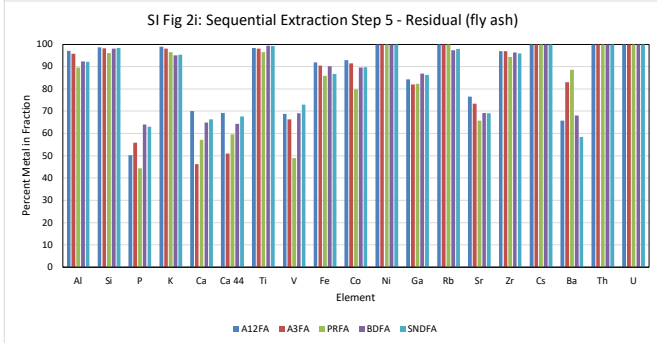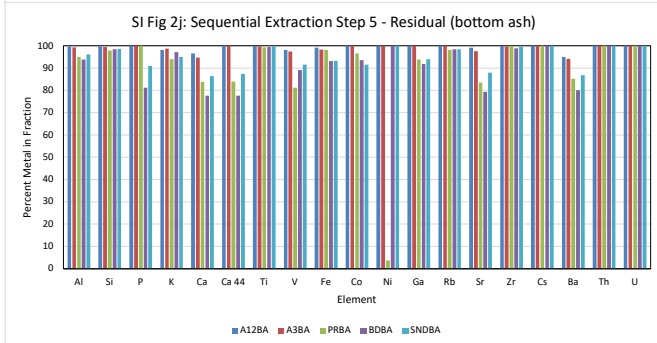

Supplement: d2va00310d2.pdf [file d2va00310d2.pdf]

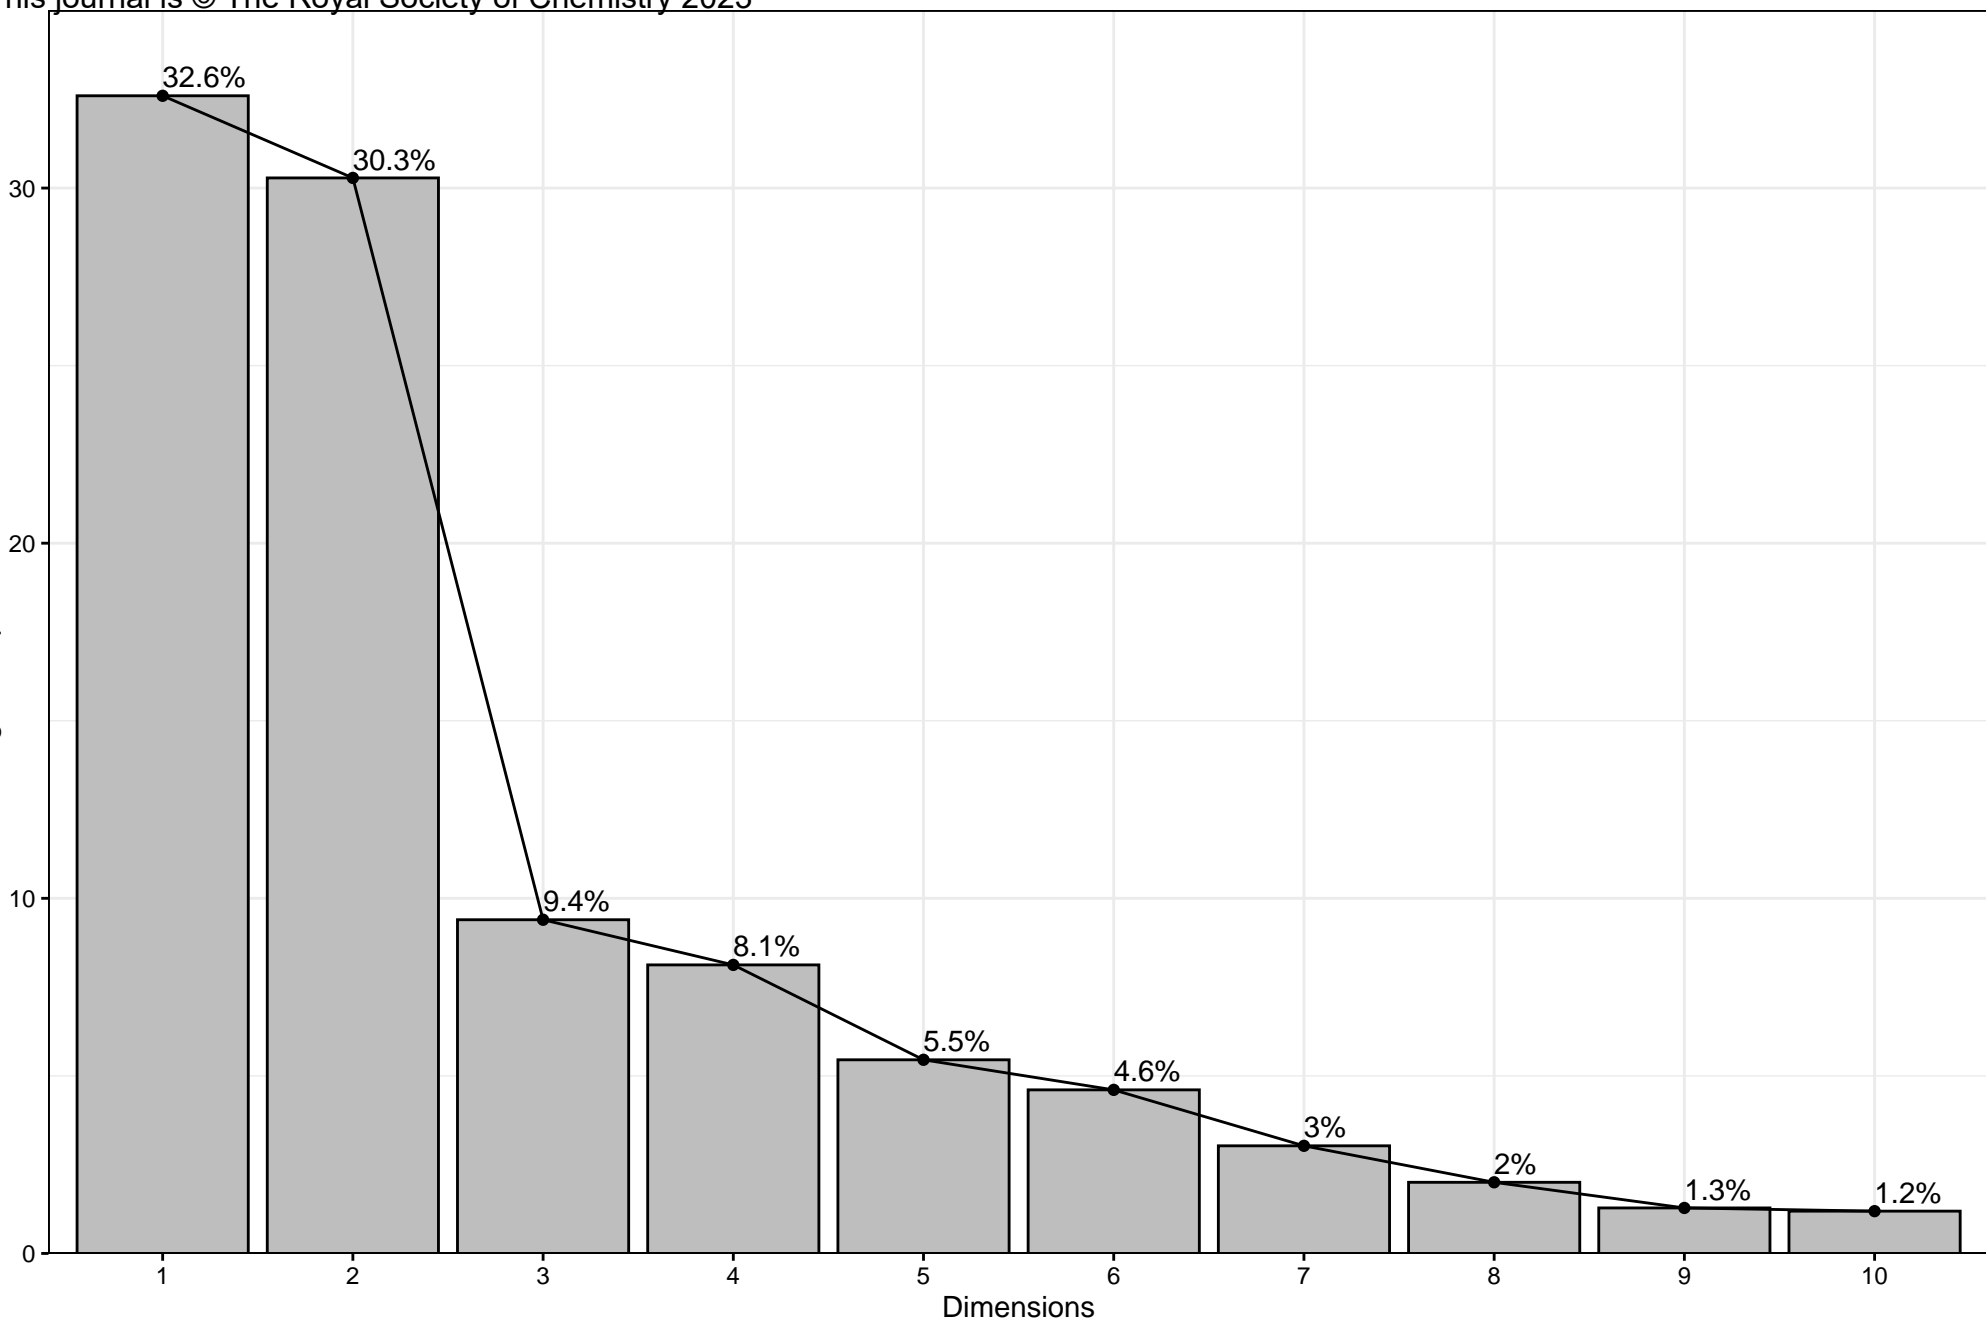

Supplement: d2va00310d3.pdf [file d2va00310d3.pdf]

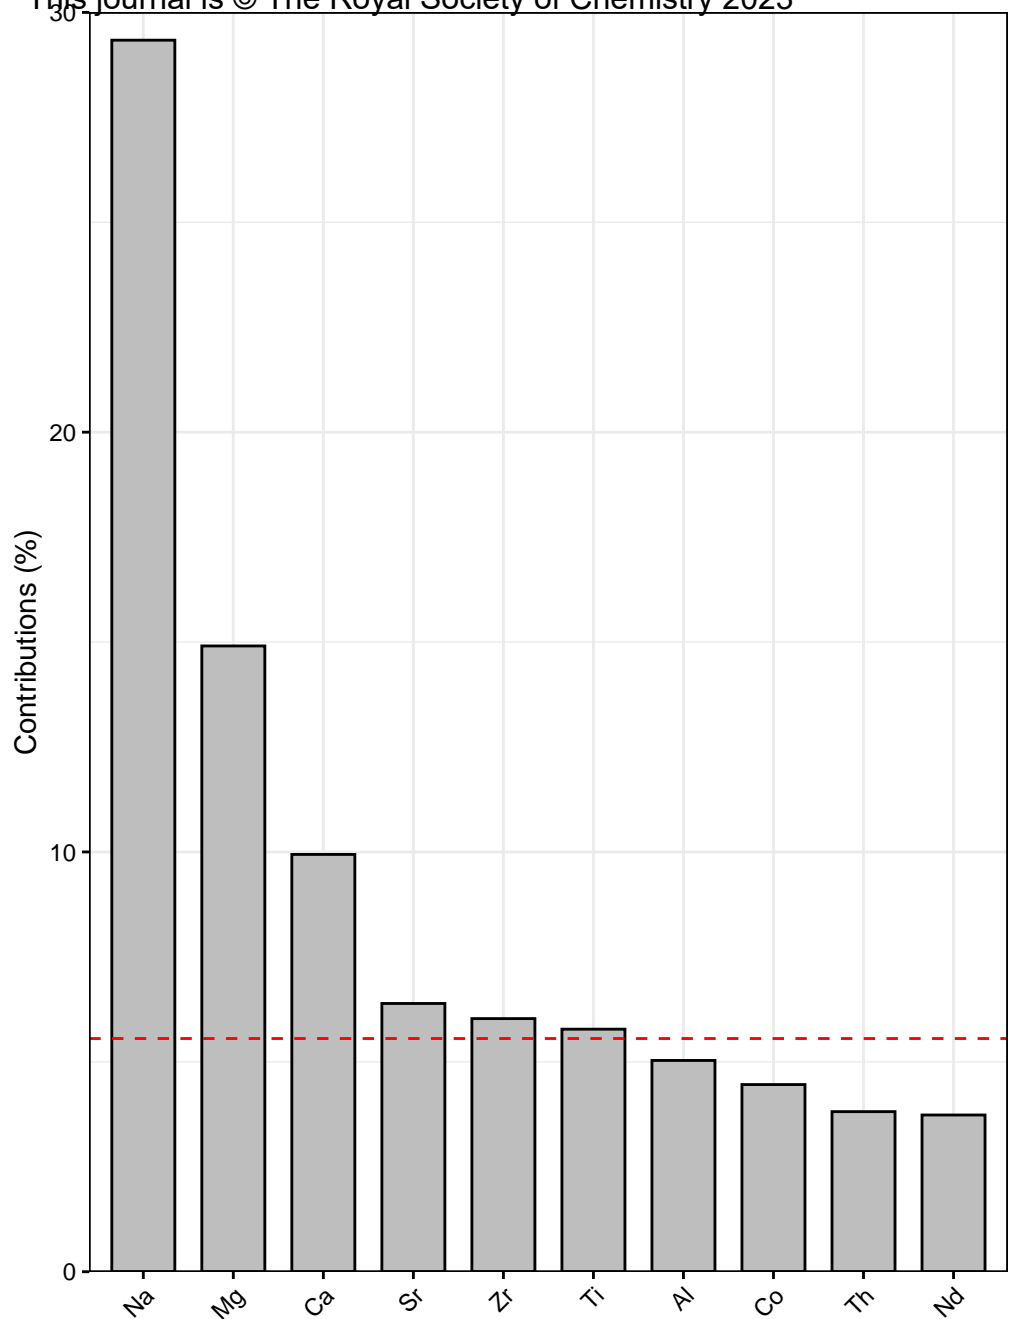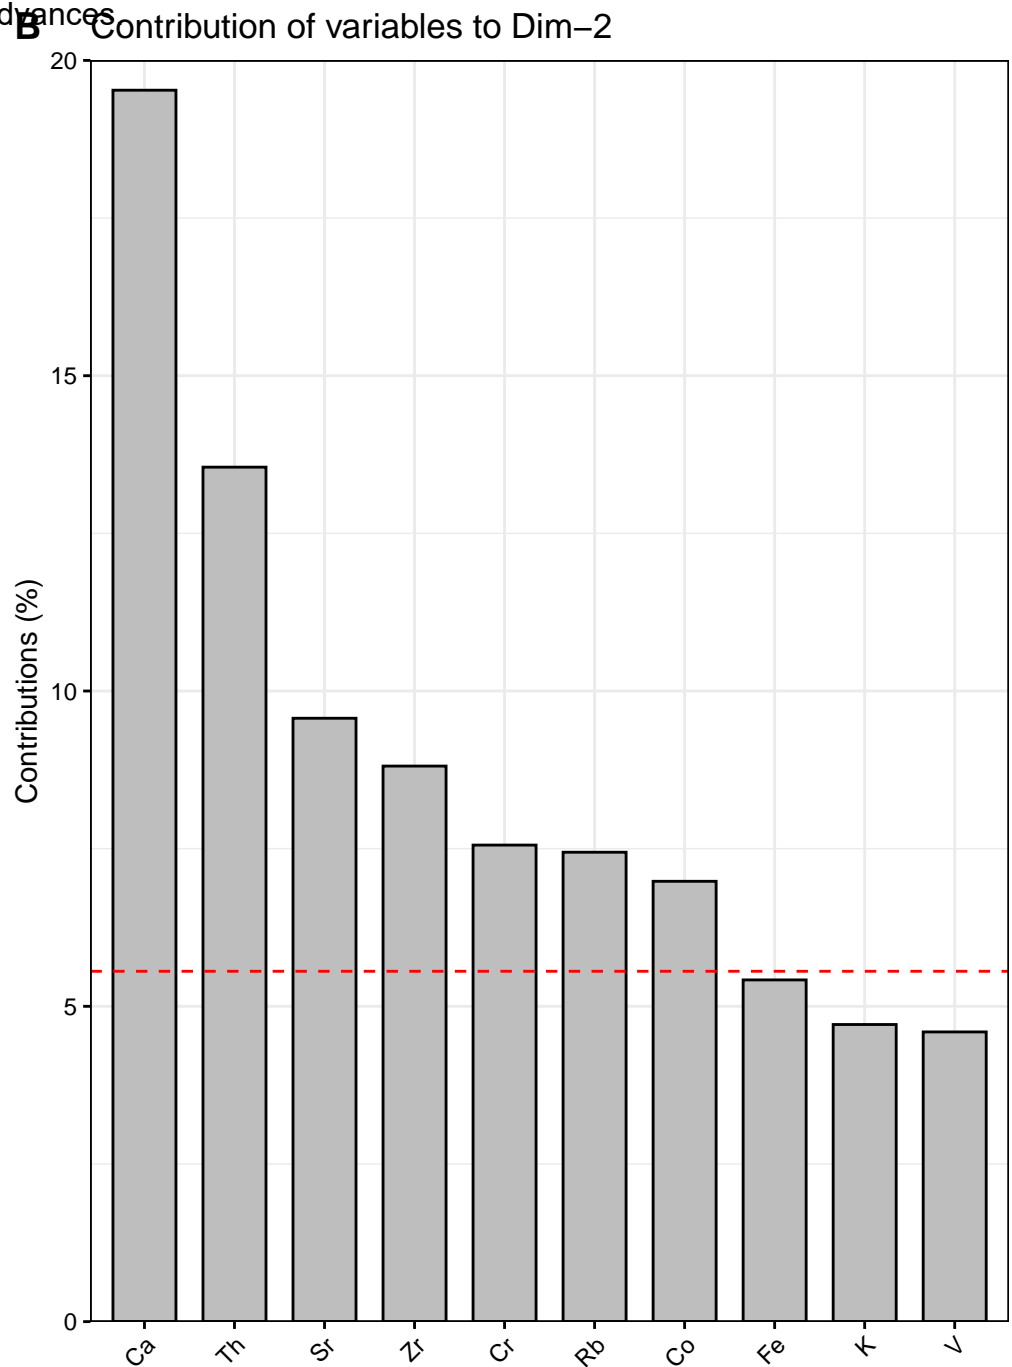

Supplement: d2va00310d4.pdf [file d2va00310d4.pdf]
